# Supplementary material for: Effects of Ethnic Classification on Substantive Findings in Adolescent Mental Health Outcomes
Source: Springer Nature journal article supplement (doi:10.1007/s10964-022-01612-6), 2022-04-19
Supplement: MOESM1 [file 20325300]

### **Supplementary Material**

Yao, E. S., Bullen, P., Meissel, K., Tiatia, J., Fleming, T., & Clark, T. C. (2022). Effects of ethnic classification on substantive findings in adolescent mental health outcomes. *Journal of Youth and Adolescence*. <https://doi.org/10.1007/s10964-022-01612-6>

**Supplementary Table S1**

*Demographic Characteristics and Mental Health Outcomes by Ethnicity*

| Ethnic group(s)                      | n    | Demographic characteristic |            |              |                  |                   |             |              | Mental health outcome <sup>a</sup>    |           |                 |
|--------------------------------------|------|----------------------------|------------|--------------|------------------|-------------------|-------------|--------------|---------------------------------------|-----------|-----------------|
|                                      |      | Age (years)                | Sex        |              | Urbanicity       |                   |             | NZDep decile | Total difficulties score <sup>b</sup> | Self-harm | Suicide attempt |
|                                      |      | M (SD)                     | Male n (%) | Female n (%) | Main urban n (%) | Minor urban n (%) | Rural n (%) | M (SD)       | n (%)                                 | n (%)     |                 |
| Overall                              | 8275 | 14.89 (1.47)               | 3752 (45)  | 4523 (55)    | 6158 (74)        | 916 (11)          | 1201 (15)   | 5.63 (2.97)  | 0.00 (1.00)                           | 1953 (24) | 364 (4)         |
| <b>Sole/combination grouping</b>     |      |                            |            |              |                  |                   |             |              |                                       |           |                 |
| European                             | 3907 | 14.94 (1.46)               | 1730 (44)  | 2177 (56)    | 2582 (66)        | 525 (13)          | 800 (20)    | 4.47 (2.62)  | -0.10 (1.01)                          | 853 (22)  | 103 (3)         |
| Māori                                | 288  | 14.65 (1.42)               | 146 (51)   | 142 (49)     | 178 (62)         | 60 (21)           | 50 (17)     | 7.83 (2.37)  | 0.11 (0.93)                           | 66 (24)   | 16 (6)          |
| Pacific                              | 538  | 14.84 (1.46)               | 224 (42)   | 314 (58)     | 517 (96)         | S (4)             | <10 (0)     | 8.95 (1.67)  | 0.06 (0.93)                           | 131 (25)  | 43 (8)          |
| Asian                                | 738  | 15.26 (1.53)               | 367 (50)   | 371 (50)     | 700 (95)         | 19 (3)            | 18 (2)      | 5.41 (2.71)  | -0.08 (0.85)                          | 128 (17)  | 21 (3)          |
| Other                                | 159  | 15.24 (1.64)               | 74 (47)    | 85 (53)      | 142 (90)         | S (6)             | <10 (4)     | 6.27 (2.67)  | 0.05 (0.96)                           | 31 (20)   | <10 (4)         |
| Māori/European                       | 967  | 14.75 (1.42)               | 457 (47)   | 510 (53)     | 625 (65)         | 163 (17)          | 179 (18)    | 6.27 (2.81)  | 0.10 (0.98)                           | 262 (27)  | 49 (5)          |
| Pacific/European                     | 384  | 14.70 (1.50)               | 179 (47)   | 205 (53)     | 350 (91)         | 16 (4)            | 17 (4)      | 7.86 (2.52)  | 0.12 (1.00)                           | 98 (26)   | 29 (8)          |
| Asian/European                       | 224  | 15.00 (1.70)               | 106 (47)   | 118 (53)     | 199 (89)         | 13 (6)            | 13 (6)      | 4.90 (2.63)  | 0.04 (1.02)                           | 51 (23)   | 12 (6)          |
| Māori/Pacific                        | 78   | 14.59 (1.32)               | 33 (42)    | 45 (58)      | 63 (81)          | S (14)            | <10 (5)     | 7.95 (2.30)  | 0.31 (1.04)                           | 21 (26)   | <10 (10)        |
| Māori/Pacific/European               | 125  | 14.47 (1.36)               | 57 (46)    | 68 (54)      | 95 (76)          | 13 (11)           | 17 (14)     | 6.92 (2.67)  | 0.30 (1.04)                           | 43 (37)   | 11 (9)          |
| 2 groups NEI                         | 559  | 14.74 (1.43)               | 236 (42)   | 323 (58)     | 467 (83)         | 37 (7)            | 56 (10)     | 5.97 (2.94)  | 0.08 (0.99)                           | 161 (29)  | 38 (7)          |
| ≥3 groups NEI                        | 309  | 14.70 (1.41)               | 144 (47)   | 165 (53)     | 240 (78)         | 28 (9)            | 41 (13)     | 6.80 (2.89)  | 0.35 (1.09)                           | 108 (36)  | 28 (10)         |
| <b>Total response grouping</b>       |      |                            |            |              |                  |                   |             |              |                                       |           |                 |
| European                             | 6209 | 14.86 (1.46)               | 2806 (45)  | 3403 (55)    | 4312 (69)        | 783 (13)          | 1113 (18)   | 5.14 (2.86)  | -0.01 (1.02)                          | 1500 (24) | 246 (4)         |
| Māori                                | 1669 | 14.70 (1.41)               | 792 (47)   | 877 (53)     | 1107 (66)        | 274 (16)          | 288 (17)    | 6.73 (2.78)  | 0.16 (1.00)                           | 469 (29)  | 105 (6)         |
| Pacific                              | 1422 | 14.75 (1.44)               | 610 (43)   | 812 (57)     | 1299 (91)        | 71 (5)            | 52 (4)      | 8.16 (2.33)  | 0.12 (0.98)                           | 379 (27)  | 119 (9)         |
| Asian                                | 1256 | 15.12 (1.56)               | 592 (47)   | 664 (53)     | 1169 (93)        | 46 (4)            | 41 (3)      | 5.68 (2.79)  | -0.03 (0.93)                          | 272 (22)  | 58 (5)          |
| Other                                | 839  | 14.77 (1.48)               | 378 (45)   | 461 (55)     | 673 (80)         | 66 (8)            | 100 (12)    | 6.07 (2.93)  | 0.19 (1.01)                           | 244 (30)  | 57 (7)          |
| <b>Administrative-prioritisation</b> |      |                            |            |              |                  |                   |             |              |                                       |           |                 |
| European                             | 3907 | 14.94 (1.46)               | 1730 (44)  | 2177 (56)    | 2582 (66)        | 525 (13)          | 800 (20)    | 4.47 (2.62)  | -0.10 (1.01)                          | 853 (22)  | 103 (3)         |
| Māori                                | 1669 | 14.70 (1.41)               | 792 (47)   | 877 (53)     | 1107 (66)        | 274 (16)          | 288 (17)    | 6.73 (2.78)  | 0.16 (1.00)                           | 469 (29)  | 105 (6)         |
| Pacific                              | 1180 | 14.80 (1.46)               | 503 (43)   | 677 (57)     | 1110 (94)        | 45 (4)            | 25 (2)      | 8.33 (2.24)  | 0.07 (0.96)                           | 301 (26)  | 95 (8)          |
| Asian                                | 1036 | 15.18 (1.58)               | 509 (49)   | 527 (51)     | 968 (93)         | 34 (3)            | 34 (3)      | 5.35 (2.71)  | -0.04 (0.91)                          | 203 (20)  | 37 (4)          |
| Other                                | 484  | 14.80 (1.50)               | 219 (45)   | 265 (55)     | 392 (81)         | 37 (8)            | 54 (11)     | 5.31 (2.78)  | 0.11 (0.98)                           | 128 (27)  | 25 (5)          |
| <b>Self-prioritisation</b>           |      |                            |            |              |                  |                   |             |              |                                       |           |                 |
| European                             | 5181 | 14.88 (1.46)               | 2323 (45)  | 2859 (55)    | 3508 (68)        | 676 (13)          | 998 (19)    | 4.76 (2.73)  | -0.04 (1.02)                          | 1215 (24) | 169 (3)         |
| Māori                                | 832  | 14.65 (1.38)               | 401 (48)   | 430 (52)     | 528 (64)         | 154 (18)          | 150 (18)    | 7.44 (2.47)  | 0.14 (0.97)                           | 231 (29)  | 57 (7)          |
| Pacific                              | 967  | 14.81 (1.44)               | 400 (41)   | 568 (59)     | 929 (96)         | S (3)             | <10 (1)     | 8.76 (1.89)  | 0.11 (0.94)                           | 250 (26)  | 84 (9)          |
| Asian                                | 949  | 15.23 (1.57)               | 474 (50)   | 475 (50)     | 898 (95)         | 26 (3)            | 25 (3)      | 5.52 (2.71)  | -0.06 (0.89)                          | 177 (19)  | 33 (4)          |
| Other                                | 239  | 15.11 (1.63)               | 117 (49)   | 122 (51)     | 212 (89)         | 15 (6)            | 12 (5)      | 6.00 (2.73)  | 0.03 (0.93)                           | 50 (22)   | 15 (7)          |
| Can't choose one ethnic group        | 107  | 14.60 (1.53)               | 37 (35)    | 70 (65)      | 84 (78)          | 13 (12)           | 10 (9)      | 5.61 (3.08)  | 0.12 (1.03)                           | 30 (29)   | <10 (6)         |

Note. Cell counts less than 10 are suppressed as "<10". Secondary suppression (S) was applied to the next smallest cell so that the suppressed cell cannot be recalculated. NEI = not elsewhere included.

<sup>a</sup>Complete case analysis used (total difficulties  $N = 7,990$  [97%]; self-harm  $N = 8,170$  [99%]; suicide attempt  $N = 8,119$  [98%]).

<sup>b</sup>Total difficulties score was standardised ( $M = 0$ ,  $SD = 1$ ).

**Supplementary Table S2**

*Multiple Linear Regression Coefficients for Total Difficulties Score<sup>a</sup> Using Non-Mutually Exclusive Ethnic Classification Methods*

| Variable                              | European model |           |              | Māori model |           |          | Pacific model |           |          | Asian model |           |          | Other ethnicities model |           |          |
|---------------------------------------|----------------|-----------|--------------|-------------|-----------|----------|---------------|-----------|----------|-------------|-----------|----------|-------------------------|-----------|----------|
|                                       | <i>B</i>       | <i>SE</i> | <i>p</i>     | <i>B</i>    | <i>SE</i> | <i>p</i> | <i>B</i>      | <i>SE</i> | <i>p</i> | <i>B</i>    | <i>SE</i> | <i>p</i> | <i>B</i>                | <i>SE</i> | <i>p</i> |
| <b>Original total response models</b> |                |           |              |             |           |          |               |           |          |             |           |          |                         |           |          |
| Intercept                             | -0.33          | 0.04      | <.001        | -0.32       | 0.04      | <.001    | -0.30         | 0.04      | <.001    | -0.29       | 0.04      | <.001    | -0.31                   | 0.04      | <.001    |
| Female (ref. male)                    | 0.19           | 0.02      | <.001        | 0.19        | 0.02      | <.001    | 0.19          | 0.02      | <.001    | 0.19        | 0.02      | <.001    | 0.19                    | 0.02      | <.001    |
| Age 14 (ref. age ≤13 years)           | 0.05           | 0.03      | .152         | 0.05        | 0.03      | .152     | 0.05          | 0.03      | .152     | 0.05        | 0.03      | .152     | 0.05                    | 0.03      | .163     |
| Age 15 (ref. age ≤13 years)           | 0.12           | 0.03      | .001         | 0.12        | 0.03      | <.001    | 0.12          | 0.03      | .001     | 0.12        | 0.03      | .001     | 0.12                    | 0.03      | <.001    |
| Age 16 (ref. age ≤13 years)           | 0.13           | 0.03      | <.001        | 0.13        | 0.03      | <.001    | 0.13          | 0.03      | <.001    | 0.13        | 0.03      | <.001    | 0.13                    | 0.03      | <.001    |
| Age ≥17 (ref. age ≤13 years)          | 0.02           | 0.04      | .501         | 0.03        | 0.04      | .348     | 0.02          | 0.04      | .526     | 0.02        | 0.04      | .506     | 0.03                    | 0.04      | .485     |
| Minor urban (ref. main urban)         | 0.01           | 0.04      | .814         | 0.00        | 0.04      | .985     | 0.03          | 0.04      | .486     | 0.01        | 0.04      | .746     | 0.02                    | 0.04      | .485     |
| Rural (ref. main urban)               | -0.05          | 0.03      | .090         | -0.06       | 0.03      | .057     | -0.04         | 0.03      | .193     | -0.05       | 0.03      | .103     | -0.04                   | 0.03      | .172     |
| NZDep3–4 (ref. NZDep1–2)              | 0.07           | 0.04      | .051         | 0.06        | 0.03      | .073     | 0.06          | 0.03      | .074     | 0.07        | 0.04      | .057     | 0.06                    | 0.03      | .081     |
| NZDep5–6 (ref. NZDep1–2)              | 0.12           | 0.04      | .001         | 0.10        | 0.04      | .003     | 0.11          | 0.04      | .002     | 0.12        | 0.04      | .001     | 0.11                    | 0.04      | .001     |
| NZDep7–8 (ref. NZDep1–2)              | 0.18           | 0.04      | <.001        | 0.15        | 0.04      | <.001    | 0.17          | 0.04      | <.001    | 0.18        | 0.04      | <.001    | 0.17                    | 0.04      | <.001    |
| NZDep9–10 (ref. NZDep1–2)             | 0.28           | 0.04      | <.001        | 0.23        | 0.03      | <.001    | 0.24          | 0.04      | <.001    | 0.26        | 0.03      | <.001    | 0.26                    | 0.03      | <.001    |
| European (ref. non-European)          | 0.05           | 0.03      | .095         |             |           |          |               |           |          |             |           |          |                         |           |          |
| Māori (ref. non-Māori)                |                |           |              | 0.18        | 0.03      | <.001    |               |           |          |             |           |          |                         |           |          |
| Pacific (ref. non-Pacific)            |                |           |              |             |           |          | 0.05          | 0.03      | .129     |             |           |          |                         |           |          |
| Asian (ref. non-Asian)                |                |           |              |             |           |          |               |           |          | -0.04       | 0.03      | .241     |                         |           |          |
| Other (ref. non-Other)                |                |           |              |             |           |          |               |           |          |             |           |          | 0.20                    | 0.04      | <.001    |
| <b>Modified total response models</b> |                |           |              |             |           |          |               |           |          |             |           |          |                         |           |          |
| Intercept                             |                |           |              | -0.38       | 0.04      | <.001    | -0.31         | 0.04      | <.001    | -0.35       | 0.04      | <.001    | -0.37                   | 0.04      | <.001    |
| Female (ref. male)                    |                |           |              | 0.22        | 0.03      | <.001    | 0.16          | 0.03      | <.001    | 0.19        | 0.03      | <.001    | 0.20                    | 0.03      | <.001    |
| Age 14 (ref. age ≤13 years)           |                |           |              | 0.05        | 0.04      | .181     | 0.01          | 0.04      | .784     | 0.03        | 0.04      | .533     | 0.05                    | 0.04      | .296     |
| Age 15 (ref. age ≤13 years)           |                |           |              | 0.15        | 0.04      | <.001    | 0.12          | 0.04      | .007     | 0.14        | 0.04      | .001     | 0.16                    | 0.05      | .001     |
| Age 16 (ref. age ≤13 years)           |                |           |              | 0.15        | 0.04      | <.001    | 0.15          | 0.04      | .001     | 0.17        | 0.04      | <.001    | 0.18                    | 0.05      | <.001    |
| Age ≥17 (ref. age ≤13 years)          |                |           |              | 0.00        | 0.04      | .974     | -0.02         | 0.05      | .710     | 0.08        | 0.04      | .066     | 0.03                    | 0.05      | .594     |
| Minor urban (ref. main urban)         |                |           |              | -0.01       | 0.04      | .756     | 0.03          | 0.05      | .573     | -0.03       | 0.05      | .539     | 0.01                    | 0.05      | .821     |
| Rural (ref. main urban)               |                |           | <sup>b</sup> | -0.06       | 0.04      | .089     | -0.05         | 0.04      | .210     | -0.08       | 0.04      | .043     | -0.05                   | 0.04      | .202     |
| NZDep3–4 (ref. NZDep1–2)              |                |           |              | 0.07        | 0.04      | .107     | 0.05          | 0.04      | .254     | 0.05        | 0.04      | .245     | 0.06                    | 0.04      | .127     |
| NZDep5–6 (ref. NZDep1–2)              |                |           |              | 0.13        | 0.04      | .002     | 0.10          | 0.04      | .026     | 0.11        | 0.04      | .005     | 0.11                    | 0.04      | .011     |
| NZDep7–8 (ref. NZDep1–2)              |                |           |              | 0.19        | 0.04      | <.001    | 0.17          | 0.05      | <.001    | 0.13        | 0.04      | .004     | 0.16                    | 0.05      | .001     |
| NZDep9–10 (ref. NZDep1–2)             |                |           |              | 0.25        | 0.05      | <.001    | 0.20          | 0.05      | <.001    | 0.28        | 0.05      | <.001    | 0.24                    | 0.05      | <.001    |
| Māori (ref. sole European)            |                |           |              | 0.20        | 0.03      | <.001    |               |           |          |             |           |          |                         |           |          |
| Pacific (ref. sole European)          |                |           |              |             |           |          | 0.12          | 0.04      | .002     |             |           |          |                         |           |          |
| Asian (ref. sole European)            |                |           |              |             |           |          |               |           |          | 0.02        | 0.03      | .650     |                         |           |          |
| Other (ref. sole European)            |                |           |              |             |           |          |               |           |          |             |           |          | 0.25                    | 0.04      | <.001    |

<sup>a</sup>Total difficulties score was standardised ( $M = 0, SD = 1$ ).

<sup>b</sup>Model not applicable as the reference group for modified total response is sole European.

**Supplementary Table S3***Multiple Linear Regression Coefficients for Total Difficulties Score<sup>a</sup> Using Mutually Exclusive Ethnic Classification Methods*

| Variable                                                    | Sole/combination model |           |          | Administrative-prioritisation model |           |          | Self-prioritisation model |           |          |
|-------------------------------------------------------------|------------------------|-----------|----------|-------------------------------------|-----------|----------|---------------------------|-----------|----------|
|                                                             | <i>B</i>               | <i>SE</i> | <i>p</i> | <i>B</i>                            | <i>SE</i> | <i>p</i> | <i>B</i>                  | <i>SE</i> | <i>p</i> |
| Intercept                                                   | -0.34                  | 0.04      | <.001    | -0.34                               | 0.04      | <.001    | -0.30                     | 0.04      | <.001    |
| Female (ref. male)                                          | 0.19                   | 0.02      | <.001    | 0.19                                | 0.02      | <.001    | 0.19                      | 0.02      | <.001    |
| Age 14 (ref. age ≤13 years)                                 | 0.05                   | 0.03      | .165     | 0.05                                | 0.03      | .167     | 0.05                      | 0.03      | .163     |
| Age 15 (ref. age ≤13 years)                                 | 0.12                   | 0.03      | <.001    | 0.12                                | 0.03      | <.001    | 0.12                      | 0.03      | .001     |
| Age 16 (ref. age ≤13 years)                                 | 0.14                   | 0.03      | <.001    | 0.14                                | 0.03      | <.001    | 0.13                      | 0.03      | <.001    |
| Age ≥17 (ref. age ≤13 years)                                | 0.04                   | 0.04      | .265     | 0.03                                | 0.04      | .336     | 0.03                      | 0.04      | .426     |
| Minor urban (ref. main urban)                               | 0.03                   | 0.04      | .472     | 0.02                                | 0.04      | .655     | 0.01                      | 0.04      | .809     |
| Rural (ref. main urban)                                     | -0.04                  | 0.03      | .177     | -0.05                               | 0.03      | .138     | -0.06                     | 0.03      | .088     |
| NZDep3–4 (ref. NZDep1–2)                                    | 0.06                   | 0.03      | .115     | 0.06                                | 0.03      | .113     | 0.06                      | 0.04      | .066     |
| NZDep5–6 (ref. NZDep1–2)                                    | 0.10                   | 0.04      | .007     | 0.10                                | 0.04      | .007     | 0.11                      | 0.04      | .002     |
| NZDep7–8 (ref. NZDep1–2)                                    | 0.13                   | 0.04      | <.001    | 0.13                                | 0.04      | <.001    | 0.16                      | 0.04      | <.001    |
| NZDep9–10 (ref. NZDep1–2)                                   | 0.19                   | 0.04      | <.001    | 0.20                                | 0.04      | <.001    | 0.24                      | 0.04      | <.001    |
| Māori (ref. European <sup>b</sup> )                         | 0.15                   | 0.06      | .019     | 0.21                                | 0.03      | <.001    | 0.12                      | 0.04      | .003     |
| Pacific (ref. European <sup>b</sup> )                       | 0.05                   | 0.05      | .384     | 0.07                                | 0.04      | .066     | 0.02                      | 0.04      | .601     |
| Asian (ref. European <sup>b</sup> )                         | -0.01                  | 0.04      | .834     | 0.03                                | 0.04      | .356     | -0.04                     | 0.04      | .287     |
| Other (ref. European <sup>b</sup> )                         | 0.11                   | 0.08      | .189     | 0.19                                | 0.05      | <.001    | 0.04                      | 0.07      | .556     |
| Māori/European (ref. European <sup>b</sup> )                | 0.16                   | 0.04      | <.001    | -                                   | -         | -        | -                         | -         | -        |
| Pacific/European (ref. European <sup>b</sup> )              | 0.14                   | 0.06      | .011     | -                                   | -         | -        | -                         | -         | -        |
| Asian/European (ref. European <sup>b</sup> )                | 0.13                   | 0.07      | .054     | -                                   | -         | -        | -                         | -         | -        |
| Māori/Pacific (ref. European <sup>b</sup> )                 | 0.32                   | 0.12      | .005     | -                                   | -         | -        | -                         | -         | -        |
| Māori/Pacific/European (ref. European <sup>b</sup> )        | 0.35                   | 0.09      | <.001    | -                                   | -         | -        | -                         | -         | -        |
| 2 groups NEI (ref. European <sup>b</sup> )                  | 0.14                   | 0.05      | .003     | -                                   | -         | -        | -                         | -         | -        |
| ≥3 groups NEI (ref. European <sup>b</sup> )                 | 0.40                   | 0.06      | <.001    | -                                   | -         | -        | -                         | -         | -        |
| Can't choose one ethnic group (ref. European <sup>b</sup> ) | -                      | -         | -        | -                                   | -         | -        | 0.12                      | 0.10      | .231     |

*Note.* NEI = not elsewhere included.

<sup>a</sup>Total difficulties score was standardised ( $M = 0$ ,  $SD = 1$ ).

<sup>b</sup>For the sole/combination and administrative-prioritisation models, the referent is *sole* European; for the self-prioritisation model, the referent is *self-prioritised* European.

**Supplementary Table S4**

*Binary Logistic Regression Coefficients for Self-Harm<sup>a</sup> Using Non-Mutually Exclusive Ethnic Classification Methods*

| Variable                              | European model |                |          | Māori model   |           |          | Pacific model |           |          | Asian model   |           |          | Other ethnicities model |           |          |
|---------------------------------------|----------------|----------------|----------|---------------|-----------|----------|---------------|-----------|----------|---------------|-----------|----------|-------------------------|-----------|----------|
|                                       | <i>Exp(B)</i>  | <i>SE</i>      | <i>p</i> | <i>Exp(B)</i> | <i>SE</i> | <i>p</i> | <i>Exp(B)</i> | <i>SE</i> | <i>p</i> | <i>Exp(B)</i> | <i>SE</i> | <i>p</i> | <i>Exp(B)</i>           | <i>SE</i> | <i>p</i> |
| <b>Original total response models</b> |                |                |          |               |           |          |               |           |          |               |           |          |                         |           |          |
| Intercept                             | 0.13           | 0.11           | <.001    | 0.15          | 0.09      | <.001    | 0.16          | 0.09      | <.001    | 0.16          | 0.09      | <.001    | 0.15                    | 0.09      | <.001    |
| Female (ref. male)                    | 1.90           | 0.05           | <.001    | 1.90          | 0.05      | <.001    | 1.89          | 0.05      | <.001    | 1.89          | 0.05      | <.001    | 1.89                    | 0.05      | <.001    |
| Age 14 (ref. age ≤13 years)           | 1.18           | 0.08           | .043     | 1.18          | 0.08      | .044     | 1.18          | 0.08      | .044     | 1.18          | 0.08      | .044     | 1.17                    | 0.08      | .048     |
| Age 15 (ref. age ≤13 years)           | 1.28           | 0.08           | .002     | 1.28          | 0.08      | .002     | 1.27          | 0.08      | .003     | 1.27          | 0.08      | .003     | 1.28                    | 0.08      | .003     |
| Age 16 (ref. age ≤13 years)           | 1.19           | 0.08           | .035     | 1.20          | 0.08      | .032     | 1.18          | 0.08      | .045     | 1.19          | 0.08      | .040     | 1.19                    | 0.08      | .038     |
| Age ≥17 (ref. age ≤13 years)          | 1.00           | 0.09           | .981     | 1.00          | 0.09      | .957     | 0.98          | 0.09      | .861     | 0.99          | 0.09      | .924     | 0.99                    | 0.09      | .896     |
| Minor urban (ref. main urban)         | 0.97           | 0.08           | .742     | 0.99          | 0.08      | .882     | 1.03          | 0.08      | .699     | 1.00          | 0.08      | .972     | 1.03                    | 0.08      | .708     |
| Rural (ref. main urban)               | 0.87           | 0.08           | .080     | 0.88          | 0.08      | .111     | 0.91          | 0.08      | .260     | 0.89          | 0.08      | .128     | 0.91                    | 0.08      | .242     |
| NZDep3–4 (ref. NZDep1–2)              | 1.18           | 0.09           | .051     | 1.16          | 0.09      | .090     | 1.16          | 0.09      | .092     | 1.17          | 0.09      | .069     | 1.15                    | 0.09      | .098     |
| NZDep5–6 (ref. NZDep1–2)              | 1.25           | 0.09           | .009     | 1.20          | 0.09      | .036     | 1.21          | 0.09      | .027     | 1.23          | 0.09      | .017     | 1.22                    | 0.09      | .024     |
| NZDep7–8 (ref. NZDep1–2)              | 1.48           | 0.09           | <.001    | 1.35          | 0.09      | <.001    | 1.39          | 0.09      | <.001    | 1.43          | 0.09      | <.001    | 1.39                    | 0.09      | <.001    |
| NZDep9–10 (ref. NZDep1–2)             | 1.57           | 0.08           | <.001    | 1.36          | 0.08      | <.001    | 1.38          | 0.09      | <.001    | 1.44          | 0.08      | <.001    | 1.42                    | 0.08      | <.001    |
| European (ref. non-European)          | 1.27           | 0.07           | <.001    | -             | -         | -        | -             | -         | -        | -             | -         | -        | -                       | -         | -        |
| Māori (ref. non-Māori)                | -              | -              | -        | 1.33          | 0.06      | <.001    | -             | -         | -        | -             | -         | -        | -                       | -         | -        |
| Pacific (ref. non-Pacific)            | -              | -              | -        | -             | -         | -        | 1.09          | 0.08      | .238     | -             | -         | -        | -                       | -         | -        |
| Asian (ref. non-Asian)                | -              | -              | -        | -             | -         | -        | -             | -         | -        | 0.87          | 0.08      | .066     | -                       | -         | -        |
| Other (ref. non-Other)                | -              | -              | -        | -             | -         | -        | -             | -         | -        | -             | -         | -        | 1.37                    | 0.08      | <.001    |
| <b>Modified total response models</b> |                |                |          |               |           |          |               |           |          |               |           |          |                         |           |          |
| Intercept                             | -              | -              | -        | 0.14          | 0.11      | <.001    | 0.14          | 0.11      | <.001    | 0.14          | 0.11      | <.001    | 0.13                    | 0.12      | <.001    |
| Female (ref. male)                    | -              | -              | -        | 1.99          | 0.07      | <.001    | 1.79          | 0.07      | <.001    | 1.83          | 0.07      | <.001    | 1.89                    | 0.07      | <.001    |
| Age 14 (ref. age ≤13 years)           | -              | -              | -        | 1.16          | 0.10      | .131     | 1.15          | 0.10      | .171     | 1.11          | 0.11      | .350     | 1.30                    | 0.11      | .016     |
| Age 15 (ref. age ≤13 years)           | -              | -              | -        | 1.43          | 0.10      | <.001    | 1.36          | 0.10      | .003     | 1.32          | 0.11      | .009     | 1.47                    | 0.11      | <.001    |
| Age 16 (ref. age ≤13 years)           | -              | -              | -        | 1.24          | 0.10      | .034     | 1.37          | 0.10      | .002     | 1.25          | 0.11      | .041     | 1.40                    | 0.11      | .003     |
| Age ≥17 (ref. age ≤13 years)          | -              | -              | -        | 1.03          | 0.11      | .772     | 1.08          | 0.11      | .512     | 1.16          | 0.11      | .183     | 1.18                    | 0.12      | .169     |
| Minor urban (ref. main urban)         | -              | -              | -        | 0.93          | 0.09      | .470     | 1.00          | 0.11      | .982     | 0.95          | 0.11      | .623     | 1.03                    | 0.11      | .793     |
| Rural (ref. main urban)               | -              | - <sup>b</sup> | -        | 0.81          | 0.09      | .017     | 0.88          | 0.10      | .210     | 0.88          | 0.10      | .205     | 0.92                    | 0.09      | .391     |
| NZDep3–4 (ref. NZDep1–2)              | -              | -              | -        | 1.19          | 0.10      | .086     | 1.22          | 0.11      | .063     | 1.19          | 0.10      | .085     | 1.20                    | 0.10      | .071     |
| NZDep5–6 (ref. NZDep1–2)              | -              | -              | -        | 1.30          | 0.10      | .009     | 1.33          | 0.11      | .008     | 1.34          | 0.10      | .004     | 1.24                    | 0.11      | .040     |
| NZDep7–8 (ref. NZDep1–2)              | -              | -              | -        | 1.55          | 0.10      | <.001    | 1.58          | 0.11      | <.001    | 1.56          | 0.11      | <.001    | 1.53                    | 0.11      | <.001    |
| NZDep9–10 (ref. NZDep1–2)             | -              | -              | -        | 1.48          | 0.11      | <.001    | 1.47          | 0.12      | .001     | 1.69          | 0.12      | <.001    | 1.51                    | 0.12      | .001     |
| Māori (ref. sole European)            | -              | -              | -        | 1.32          | 0.07      | <.001    | -             | -         | -        | -             | -         | -        | -                       | -         | -        |
| Pacific (ref. sole European)          | -              | -              | -        | -             | -         | -        | 1.14          | 0.09      | .165     | -             | -         | -        | -                       | -         | -        |
| Asian (ref. sole European)            | -              | -              | -        | -             | -         | -        | -             | -         | -        | 0.91          | 0.08      | .253     | -                       | -         | -        |
| Other (ref. sole European)            | -              | -              | -        | -             | -         | -        | -             | -         | -        | -             | -         | -        | 1.41                    | 0.09      | <.001    |

<sup>a</sup>0 = no self-harm in the past 12 months; 1 = self-harm in the past 12 months.

<sup>b</sup>Model not applicable as the reference group for modified total response is sole European.

**Supplementary Table S5**

*Binary Logistic Regression Coefficients for Self-Harm<sup>a</sup> Using Mutually Exclusive Ethnic Classification Methods*

| Variable                                                    | Sole/combination model |           |          | Administrative-prioritisation model |           |          | Self-prioritisation model |           |          |
|-------------------------------------------------------------|------------------------|-----------|----------|-------------------------------------|-----------|----------|---------------------------|-----------|----------|
|                                                             | <i>Exp(B)</i>          | <i>SE</i> | <i>p</i> | <i>Exp(B)</i>                       | <i>SE</i> | <i>p</i> | <i>Exp(B)</i>             | <i>SE</i> | <i>p</i> |
| Intercept                                                   | 0.15                   | 0.09      | <.001    | 0.15                                | 0.09      | <.001    | 0.16                      | 0.09      | <.001    |
| Female (ref. male)                                          | 1.89                   | 0.05      | <.001    | 1.90                                | 0.05      | <.001    | 1.89                      | 0.05      | <.001    |
| Age 14 (ref. age ≤13 years)                                 | 1.17                   | 0.08      | .050     | 1.17                                | 0.08      | .049     | 1.17                      | 0.08      | .045     |
| Age 15 (ref. age ≤13 years)                                 | 1.30                   | 0.08      | .001     | 1.28                                | 0.08      | .002     | 1.28                      | 0.08      | .002     |
| Age 16 (ref. age ≤13 years)                                 | 1.22                   | 0.08      | .017     | 1.21                                | 0.08      | .023     | 1.21                      | 0.08      | .026     |
| Age ≥17 (ref. age ≤13 years)                                | 1.04                   | 0.09      | .669     | 1.02                                | 0.09      | .858     | 1.02                      | 0.09      | .856     |
| Minor urban (ref. main urban)                               | 1.00                   | 0.09      | .988     | 0.99                                | 0.09      | .892     | 0.96                      | 0.09      | .615     |
| Rural (ref. main urban)                                     | 0.88                   | 0.08      | .100     | 0.88                                | 0.08      | .098     | 0.85                      | 0.08      | .047     |
| NZDep3–4 (ref. NZDep1–2)                                    | 1.16                   | 0.09      | .081     | 1.16                                | 0.09      | .091     | 1.18                      | 0.09      | .052     |
| NZDep5–6 (ref. NZDep1–2)                                    | 1.21                   | 0.09      | .032     | 1.20                                | 0.09      | .041     | 1.24                      | 0.09      | .016     |
| NZDep7–8 (ref. NZDep1–2)                                    | 1.34                   | 0.09      | .001     | 1.34                                | 0.09      | .001     | 1.42                      | 0.09      | <.001    |
| NZDep9–10 (ref. NZDep1–2)                                   | 1.34                   | 0.09      | .001     | 1.32                                | 0.09      | .002     | 1.43                      | 0.09      | <.001    |
| Māori (ref. European <sup>b</sup> )                         | 1.04                   | 0.15      | .795     | 1.36                                | 0.07      | <.001    | 1.19                      | 0.09      | .056     |
| Pacific (ref. European <sup>b</sup> )                       | 0.99                   | 0.12      | .967     | 1.09                                | 0.09      | .321     | 0.94                      | 0.10      | .539     |
| Asian (ref. European <sup>b</sup> )                         | 0.73                   | 0.11      | .003     | 0.86                                | 0.09      | .088     | 0.72                      | 0.09      | <.001    |
| Other (ref. European <sup>b</sup> )                         | 0.86                   | 0.21      | .459     | 1.27                                | 0.11      | .032     | 0.84                      | 0.17      | .301     |
| Māori/European (ref. European <sup>b</sup> )                | 1.29                   | 0.09      | .003     | -                                   | -         | -        | -                         | -         | -        |
| Pacific/European (ref. European <sup>b</sup> )              | 1.16                   | 0.13      | .265     | -                                   | -         | -        | -                         | -         | -        |
| Asian/European (ref. European <sup>b</sup> )                | 1.08                   | 0.17      | .652     | -                                   | -         | -        | -                         | -         | -        |
| Māori/Pacific (ref. European <sup>b</sup> )                 | 1.10                   | 0.27      | .715     | -                                   | -         | -        | -                         | -         | -        |
| Māori/Pacific/European (ref. European <sup>b</sup> )        | 1.92                   | 0.20      | .001     | -                                   | -         | -        | -                         | -         | -        |
| 2 groups NEI (ref. European <sup>b</sup> )                  | 1.36                   | 0.10      | .003     | -                                   | -         | -        | -                         | -         | -        |
| ≥3 groups NEI (ref. European <sup>b</sup> )                 | 1.89                   | 0.13      | <.001    | -                                   | -         | -        | -                         | -         | -        |
| Can't choose one ethnic group (ref. European <sup>b</sup> ) | -                      | -         | -        | -                                   | -         | -        | 1.18                      | 0.22      | .450     |

*Note.* NEI = not elsewhere included.

<sup>a</sup>0 = no self-harm in the past 12 months; 1 = self-harm in the past 12 months.

<sup>b</sup>For the sole/combination and administrative-prioritisation models, the referent is *sole* European; for the self-prioritisation model, the referent is *self-prioritised* European.

**Supplementary Table S6**

*Binary Logistic Regression Coefficients for Suicide Attempt<sup>a</sup> Using Non-Mutually Exclusive Ethnic Classification Methods*

| Variable                              | European model |                |          | Māori model   |           |          | Pacific model |           |          | Asian model   |           |          | Other ethnicities model |           |          |
|---------------------------------------|----------------|----------------|----------|---------------|-----------|----------|---------------|-----------|----------|---------------|-----------|----------|-------------------------|-----------|----------|
|                                       | <i>Exp(B)</i>  | <i>SE</i>      | <i>p</i> | <i>Exp(B)</i> | <i>SE</i> | <i>p</i> | <i>Exp(B)</i> | <i>SE</i> | <i>p</i> | <i>Exp(B)</i> | <i>SE</i> | <i>p</i> | <i>Exp(B)</i>           | <i>SE</i> | <i>p</i> |
| <b>Original total response models</b> |                |                |          |               |           |          |               |           |          |               |           |          |                         |           |          |
| Intercept                             | 0.01           | 0.24           | <.001    | 0.01          | 0.21      | <.001    | 0.01          | 0.21      | <.001    | 0.01          | 0.21      | <.001    | 0.01                    | 0.21      | <.001    |
| Female (ref. male)                    | 2.87           | 0.13           | <.001    | 2.91          | 0.13      | <.001    | 2.81          | 0.13      | <.001    | 2.88          | 0.13      | <.001    | 2.87                    | 0.13      | <.001    |
| Age 14 (ref. age ≤13 years)           | 1.56           | 0.16           | .007     | 1.56          | 0.16      | .007     | 1.56          | 0.16      | .007     | 1.56          | 0.16      | .007     | 1.56                    | 0.16      | .007     |
| Age 15 (ref. age ≤13 years)           | 1.25           | 0.17           | .204     | 1.27          | 0.17      | .174     | 1.26          | 0.17      | .188     | 1.25          | 0.17      | .203     | 1.25                    | 0.17      | .193     |
| Age 16 (ref. age ≤13 years)           | 1.31           | 0.18           | .122     | 1.35          | 0.18      | .087     | 1.33          | 0.18      | .104     | 1.32          | 0.18      | .121     | 1.34                    | 0.18      | .102     |
| Age ≥17 (ref. age ≤13 years)          | 0.95           | 0.19           | .811     | 1.00          | 0.19      | .997     | 0.99          | 0.19      | .942     | 0.96          | 0.19      | .817     | 0.98                    | 0.19      | .900     |
| Minor urban (ref. main urban)         | 1.01           | 0.17           | .954     | 0.93          | 0.17      | .669     | 1.15          | 0.17      | .423     | 1.00          | 0.17      | .977     | 1.00                    | 0.17      | .976     |
| Rural (ref. main urban)               | 1.03           | 0.17           | .859     | 0.96          | 0.17      | .791     | 1.11          | 0.17      | .540     | 1.02          | 0.17      | .899     | 1.01                    | 0.17      | .935     |
| NZDep3–4 (ref. NZDep1–2)              | 1.02           | 0.21           | .919     | 1.03          | 0.21      | .897     | 1.00          | 0.21      | .992     | 1.03          | 0.21      | .893     | 1.02                    | 0.21      | .911     |
| NZDep5–6 (ref. NZDep1–2)              | 1.40           | 0.19           | .084     | 1.39          | 0.19      | .094     | 1.33          | 0.20      | .148     | 1.42          | 0.19      | .073     | 1.41                    | 0.19      | .074     |
| NZDep7–8 (ref. NZDep1–2)              | 1.38           | 0.20           | .102     | 1.33          | 0.20      | .149     | 1.25          | 0.20      | .256     | 1.41          | 0.20      | .080     | 1.39                    | 0.20      | .094     |
| NZDep9–10 (ref. NZDep1–2)             | 2.55           | 0.18           | <.001    | 2.50          | 0.17      | <.001    | 1.98          | 0.18      | <.001    | 2.69          | 0.17      | <.001    | 2.63                    | 0.17      | <.001    |
| European (ref. non-European)          | 0.87           | 0.13           | .256     | -             | -         | -        | -             | -         | -        | -             | -         | -        | -                       | -         | -        |
| Māori (ref. non-Māori)                | -              | -              | -        | 1.49          | 0.12      | .001     | -             | -         | -        | -             | -         | -        | -                       | -         | -        |
| Pacific (ref. non-Pacific)            | -              | -              | -        | -             | -         | -        | 1.89          | 0.14      | <.001    | -             | -         | -        | -                       | -         | -        |
| Asian (ref. non-Asian)                | -              | -              | -        | -             | -         | -        | -             | -         | -        | 1.11          | 0.15      | .490     | -                       | -         | -        |
| Other (ref. non-Other)                | -              | -              | -        | -             | -         | -        | -             | -         | -        | -             | -         | -        | 1.62                    | 0.15      | .002     |
| <b>Modified total response models</b> |                |                |          |               |           |          |               |           |          |               |           |          |                         |           |          |
| Intercept                             | -              | -              | -        | 0.01          | 0.27      | <.001    | 0.01          | 0.29      | <.001    | 0.01          | 0.31      | <.001    | 0.01                    | 0.31      | <.001    |
| Female (ref. male)                    | -              | -              | -        | 2.87          | 0.17      | <.001    | 3.23          | 0.17      | <.001    | 2.59          | 0.19      | <.001    | 3.08                    | 0.20      | <.001    |
| Age 14 (ref. age ≤13 years)           | -              | -              | -        | 1.33          | 0.21      | .172     | 1.77          | 0.21      | .008     | 1.54          | 0.27      | .104     | 1.35                    | 0.26      | .257     |
| Age 15 (ref. age ≤13 years)           | -              | -              | -        | 1.12          | 0.22      | .616     | 1.29          | 0.23      | .264     | 1.39          | 0.27      | .222     | 1.31                    | 0.27      | .311     |
| Age 16 (ref. age ≤13 years)           | -              | -              | -        | 1.28          | 0.23      | .283     | 1.66          | 0.23      | .025     | 1.51          | 0.27      | .129     | 1.97                    | 0.26      | .008     |
| Age ≥17 (ref. age ≤13 years)          | -              | -              | -        | 0.95          | 0.25      | .849     | 0.96          | 0.26      | .876     | 1.26          | 0.28      | .406     | 1.10                    | 0.30      | .742     |
| Minor urban (ref. main urban)         | -              | -              | -        | 1.02          | 0.20      | .937     | 1.25          | 0.23      | .331     | 0.80          | 0.29      | .441     | 1.03                    | 0.26      | .920     |
| Rural (ref. main urban)               | -              | - <sup>b</sup> | -        | 1.11          | 0.19      | .565     | 1.35          | 0.23      | .184     | 1.48          | 0.22      | .079     | 1.45                    | 0.21      | .079     |
| NZDep3–4 (ref. NZDep1–2)              | -              | -              | -        | 1.05          | 0.25      | .846     | 0.79          | 0.29      | .413     | 0.91          | 0.27      | .732     | 0.78                    | 0.27      | .351     |
| NZDep5–6 (ref. NZDep1–2)              | -              | -              | -        | 1.43          | 0.23      | .128     | 1.54          | 0.25      | .088     | 1.79          | 0.24      | .016     | 1.42                    | 0.24      | .152     |
| NZDep7–8 (ref. NZDep1–2)              | -              | -              | -        | 1.34          | 0.24      | .225     | 1.25          | 0.27      | .410     | 1.30          | 0.28      | .339     | 1.19                    | 0.27      | .515     |
| NZDep9–10 (ref. NZDep1–2)             | -              | -              | -        | 1.59          | 0.24      | .057     | 1.83          | 0.26      | .018     | 2.66          | 0.26      | <.001    | 2.05                    | 0.26      | .006     |
| Māori (ref. sole European)            | -              | -              | -        | 2.31          | 0.16      | <.001    | -             | -         | -        | -             | -         | -        | -                       | -         | -        |
| Pacific (ref. sole European)          | -              | -              | -        | -             | -         | -        | 2.74          | 0.18      | <.001    | -             | -         | -        | -                       | -         | -        |
| Asian (ref. sole European)            | -              | -              | -        | -             | -         | -        | -             | -         | -        | 1.69          | 0.19      | .005     | -                       | -         | -        |
| Other (ref. sole European)            | -              | -              | -        | -             | -         | -        | -             | -         | -        | -             | -         | -        | 2.52                    | 0.19      | <.001    |

<sup>a</sup>0 = no suicide attempt in the past 12 months; 1 = suicide attempt in the past 12 months.

<sup>b</sup>Model not applicable as the reference group for modified total response is sole European.

**Supplementary Table S7***Binary Logistic Regression Coefficients for Suicide Attempt<sup>a</sup> Using Mutually Exclusive Ethnic Classification Methods*

| Variable                                                    | Sole/combination model |           |          | Administrative-prioritisation model |           |          | Self-prioritisation model |           |          |
|-------------------------------------------------------------|------------------------|-----------|----------|-------------------------------------|-----------|----------|---------------------------|-----------|----------|
|                                                             | <i>Exp(B)</i>          | <i>SE</i> | <i>p</i> | <i>Exp(B)</i>                       | <i>SE</i> | <i>p</i> | <i>Exp(B)</i>             | <i>SE</i> | <i>p</i> |
| Intercept                                                   | 0.01                   | 0.22      | <.001    | 0.01                                | 0.22      | <.001    | 0.01                      | 0.21      | <.001    |
| Female (ref. male)                                          | 2.85                   | 0.13      | <.001    | 2.85                                | 0.13      | <.001    | 2.84                      | 0.13      | <.001    |
| Age 14 (ref. age ≤13 years)                                 | 1.56                   | 0.16      | .007     | 1.55                                | 0.16      | .008     | 1.53                      | 0.16      | .009     |
| Age 15 (ref. age ≤13 years)                                 | 1.30                   | 0.17      | .134     | 1.27                                | 0.17      | .162     | 1.24                      | 0.17      | .208     |
| Age 16 (ref. age ≤13 years)                                 | 1.41                   | 0.18      | .056     | 1.37                                | 0.18      | .074     | 1.33                      | 0.18      | .111     |
| Age ≥17 (ref. age ≤13 years)                                | 1.06                   | 0.20      | .784     | 1.02                                | 0.20      | .917     | 0.98                      | 0.20      | .916     |
| Minor urban (ref. main urban)                               | 1.16                   | 0.17      | .396     | 1.13                                | 0.17      | .482     | 1.09                      | 0.17      | .610     |
| Rural (ref. main urban)                                     | 1.12                   | 0.18      | .528     | 1.10                                | 0.18      | .585     | 1.07                      | 0.18      | .680     |
| NZDep3–4 (ref. NZDep1–2)                                    | 0.97                   | 0.21      | .888     | 0.96                                | 0.21      | .854     | 0.98                      | 0.21      | .941     |
| NZDep5–6 (ref. NZDep1–2)                                    | 1.25                   | 0.20      | .250     | 1.23                                | 0.20      | .287     | 1.30                      | 0.20      | .183     |
| NZDep7–8 (ref. NZDep1–2)                                    | 1.09                   | 0.20      | .666     | 1.08                                | 0.20      | .716     | 1.17                      | 0.20      | .443     |
| NZDep9–10 (ref. NZDep1–2)                                   | 1.71                   | 0.19      | .004     | 1.66                                | 0.19      | .007     | 1.81                      | 0.19      | .002     |
| Māori (ref. European <sup>b</sup> )                         | 1.83                   | 0.29      | .037     | 2.26                                | 0.15      | <.001    | 1.90                      | 0.17      | <.001    |
| Pacific (ref. European <sup>b</sup> )                       | 2.41                   | 0.22      | <.001    | 2.58                                | 0.18      | <.001    | 2.04                      | 0.17      | <.001    |
| Asian (ref. European <sup>b</sup> )                         | 1.10                   | 0.25      | .693     | 1.43                                | 0.20      | .076     | 1.10                      | 0.20      | .639     |
| Other (ref. European <sup>b</sup> )                         | 1.50                   | 0.43      | .347     | 2.00                                | 0.23      | .003     | 2.12                      | 0.28      | .008     |
| Māori/European (ref. European <sup>b</sup> )                | 1.83                   | 0.18      | .001     | -                                   | -         | -        | -                         | -         | -        |
| Pacific/European (ref. European <sup>b</sup> )              | 2.63                   | 0.23      | <.001    | -                                   | -         | -        | -                         | -         | -        |
| Asian/European (ref. European <sup>b</sup> )                | 2.33                   | 0.32      | .008     | -                                   | -         | -        | -                         | -         | -        |
| Māori/Pacific (ref. European <sup>b</sup> )                 | 3.29                   | 0.40      | .003     | -                                   | -         | -        | -                         | -         | -        |
| Māori/Pacific/European (ref. European <sup>b</sup> )        | 3.38                   | 0.34      | <.001    | -                                   | -         | -        | -                         | -         | -        |
| 2 groups NEI (ref. European <sup>b</sup> )                  | 2.44                   | 0.20      | <.001    | -                                   | -         | -        | -                         | -         | -        |
| ≥3 groups NEI (ref. European <sup>b</sup> )                 | 3.44                   | 0.23      | <.001    | -                                   | -         | -        | -                         | -         | -        |
| Can't choose one ethnic group (ref. European <sup>b</sup> ) | -                      | -         | -        | -                                   | -         | -        | 1.66                      | 0.43      | .238     |

*Note.* NEI = not elsewhere included.

<sup>a</sup>0 = no suicide attempt in the past 12 months; 1 = suicide attempt in the past 12 months.

<sup>b</sup>For the sole/combination and administrative-prioritisation models, the referent is *sole* European; for the self-prioritisation model, the referent is *self-prioritised* European.
